# Supplementary material for: 4-(4-Carboxyphenoxy)phthalate-based coordination polymers and their application in sensing nitrobenzene
Source: Royal Society of Chemistry journal article supplement (doi:10.1039/c4dt02762k), 2014-11-19
Supplement: c4dt02762k1.pdf [file c4dt02762k1.pdf]

## Supporting materials

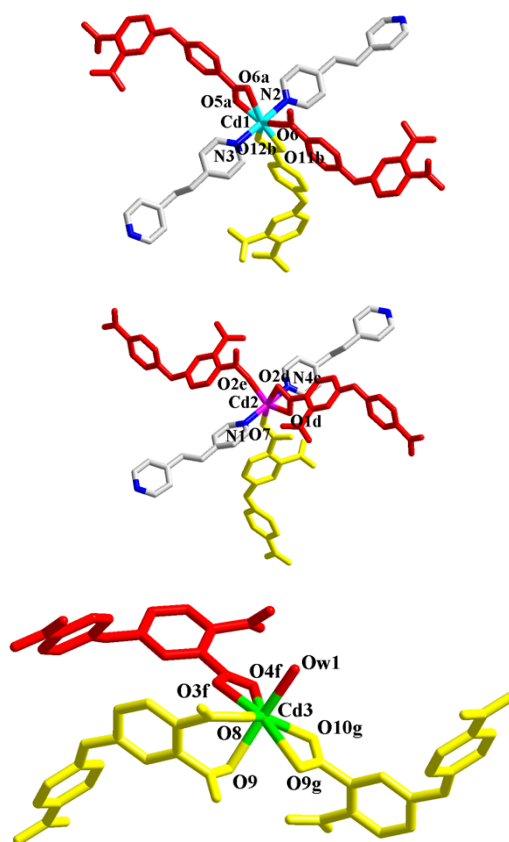

**Fig. S1** Coordination environments around Cd1, Cd2 and Cd3 in **1**.

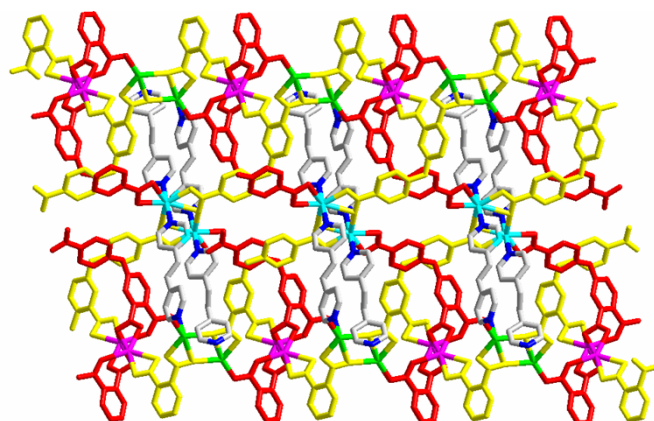

**Fig. S2** 3-D network of **1**.

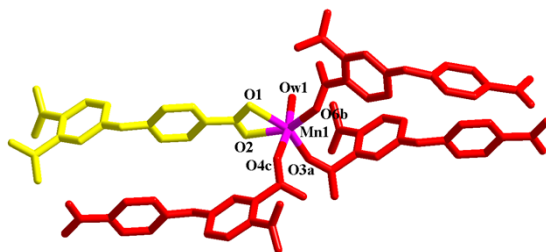

**Fig. S3** Coordination environment around Mn1 in **2**.

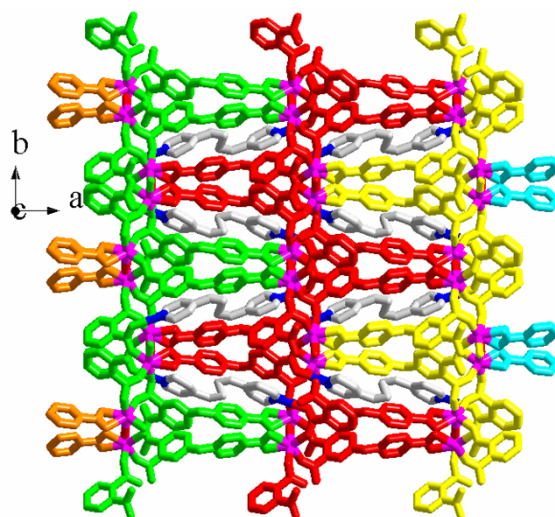

**Fig. S4** 3-D network for **2**, showing N-H...O hydrogen bonded interactions.

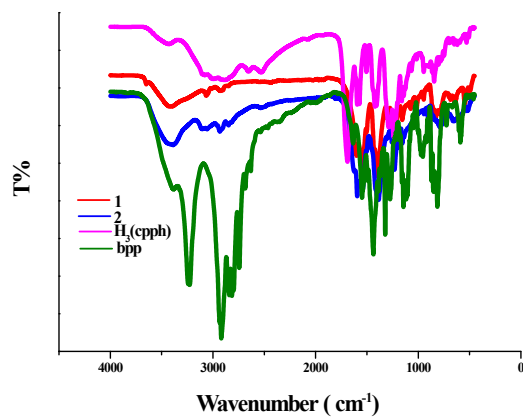

**Fig. S5** IR spectra of **1**, **2**, H<sub>3</sub>(cp-ph) and bpp.
